# Supplementary figures and images for: Genome Survey Sequencing of the Mole Cricket Gryllotalpa orientalis
Source: MDPI journal article supplement (doi:10.3390/genes14020255), 2023-01-18

k= 21

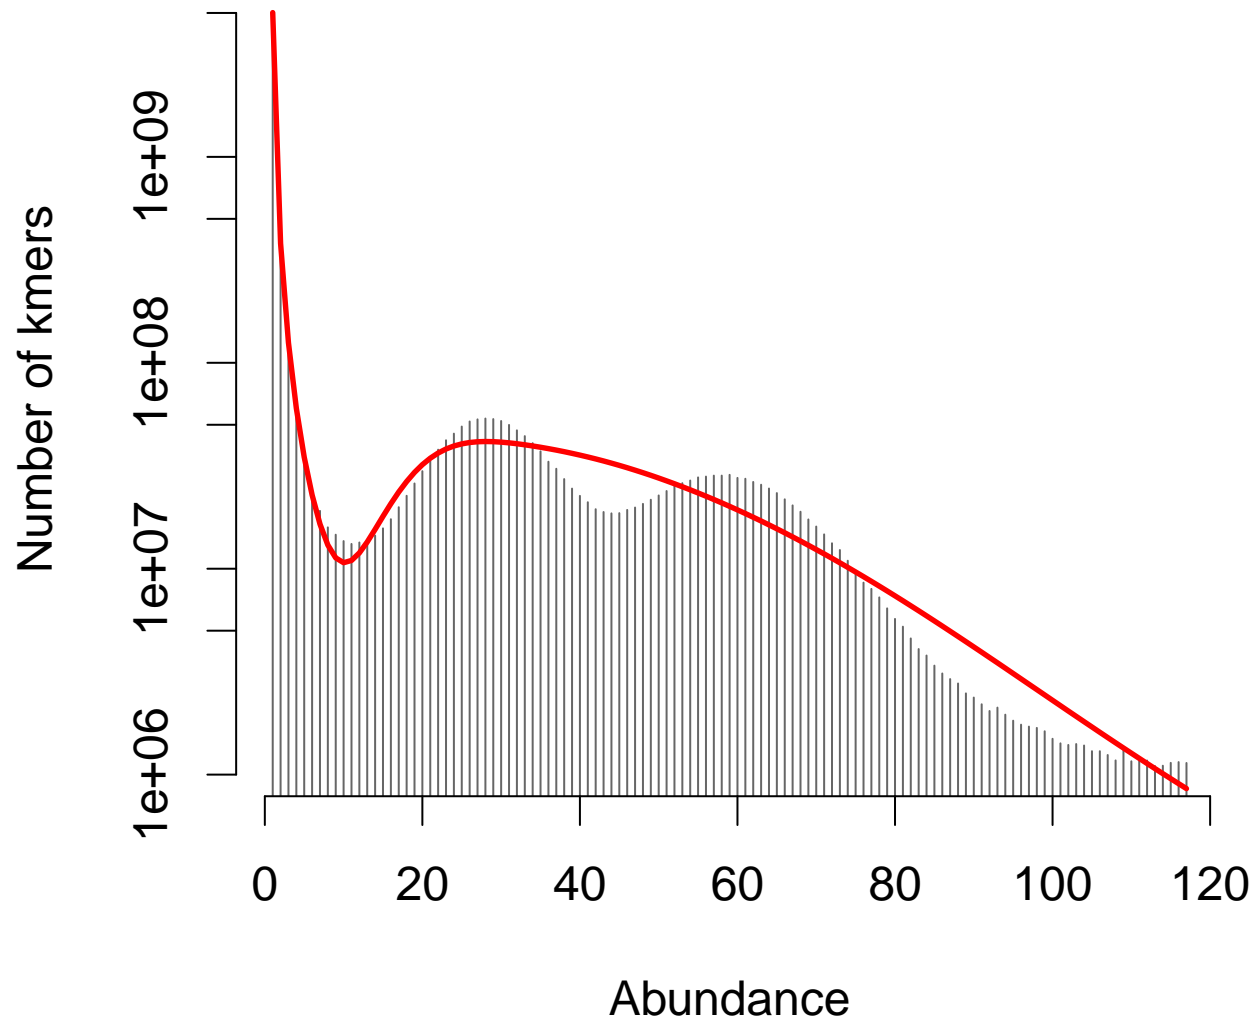

k= 31

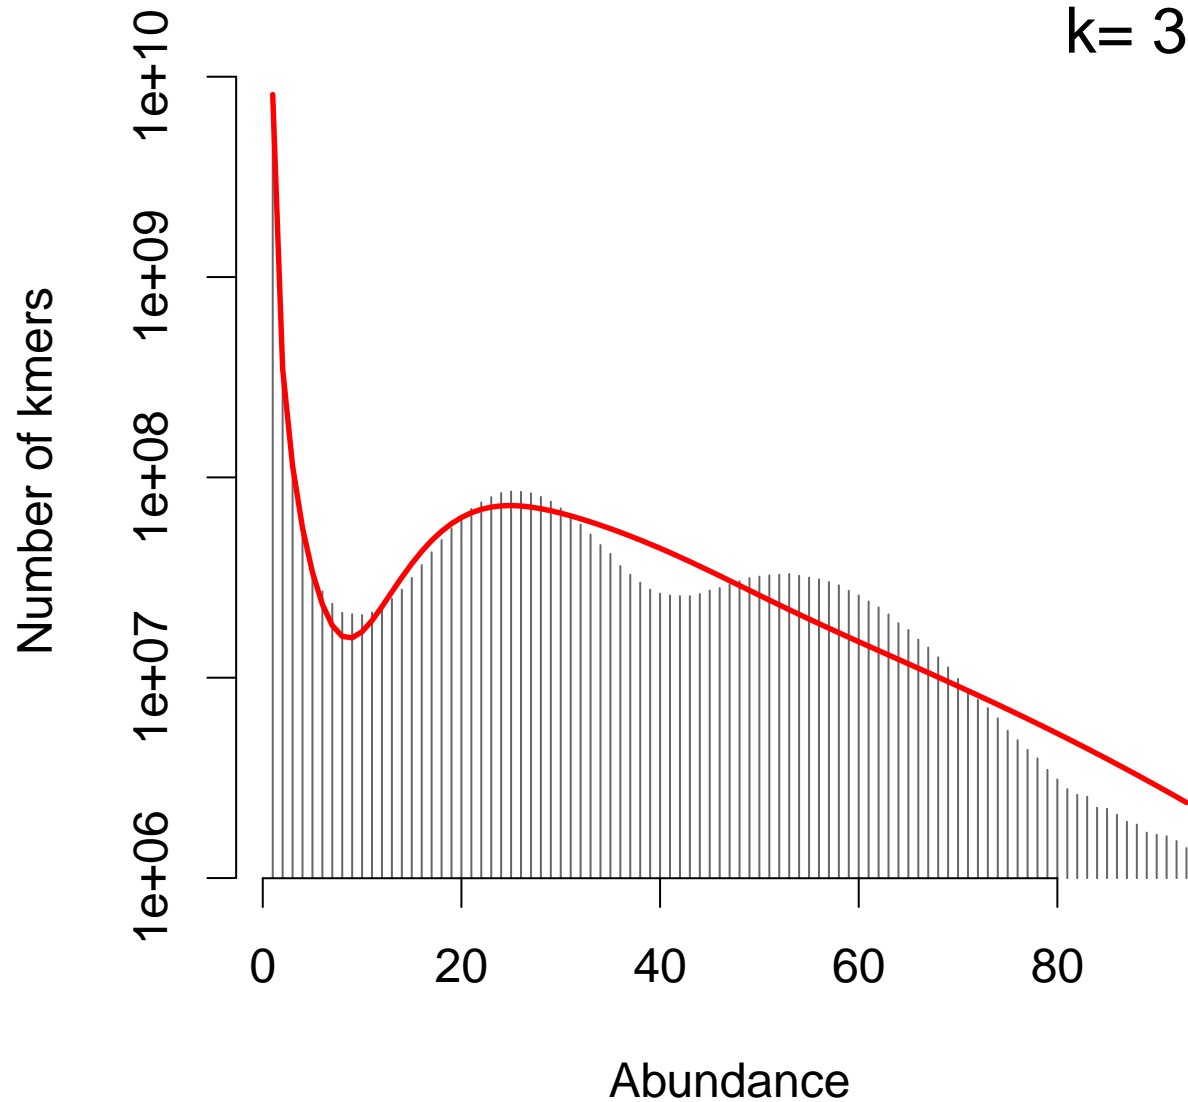

k= 41

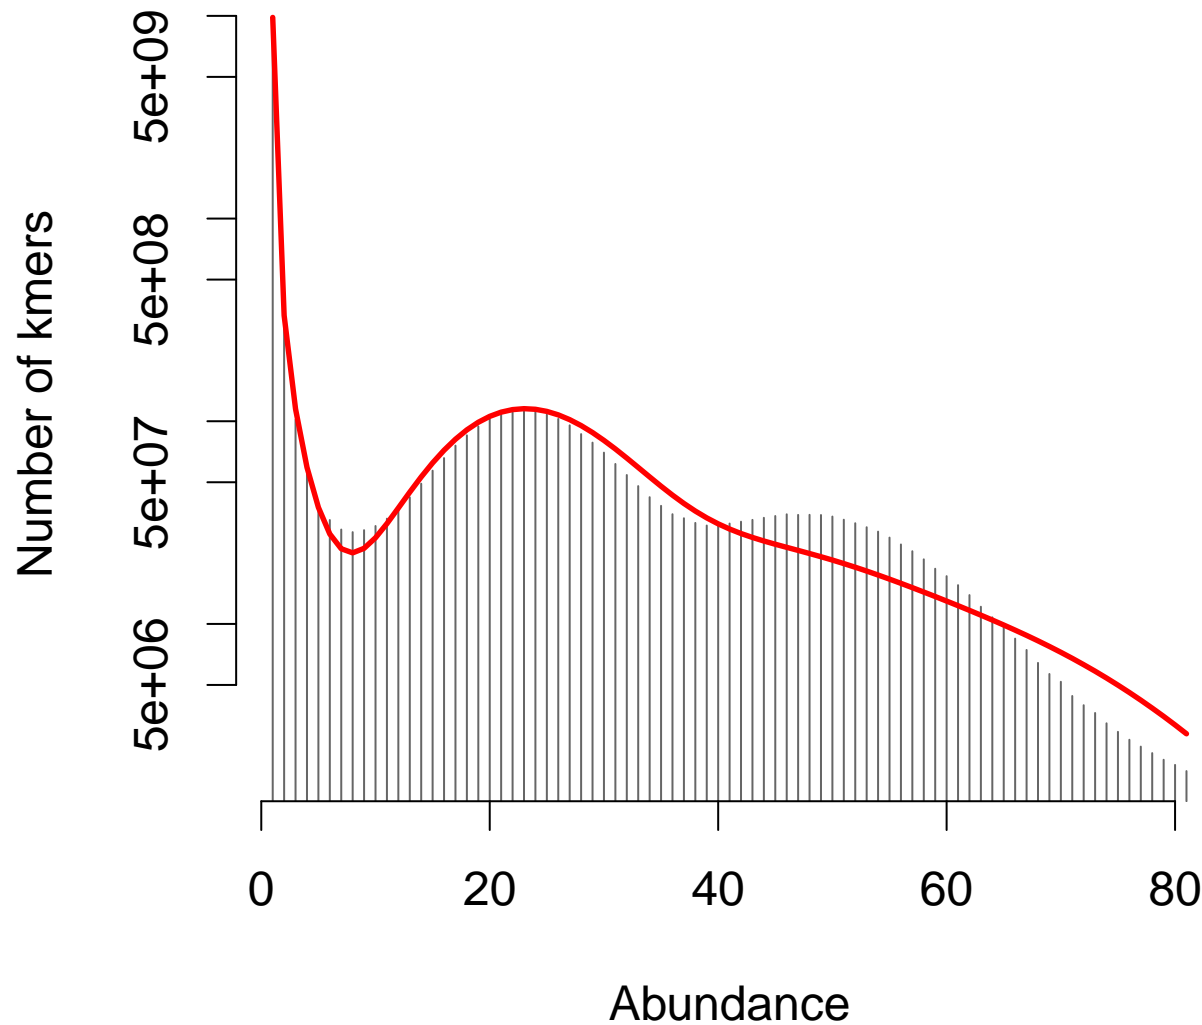

k= 51

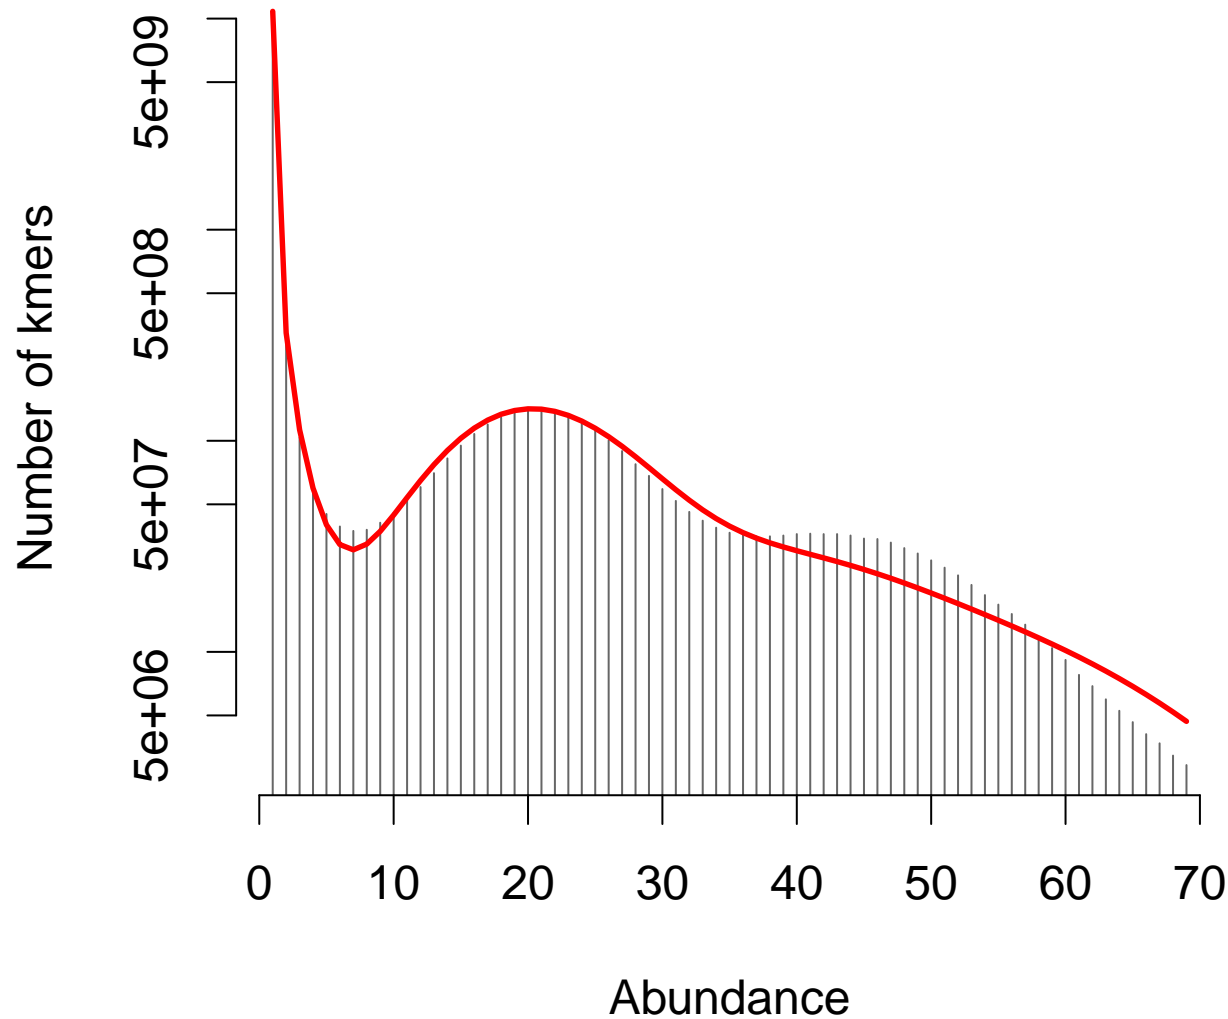

k= 61

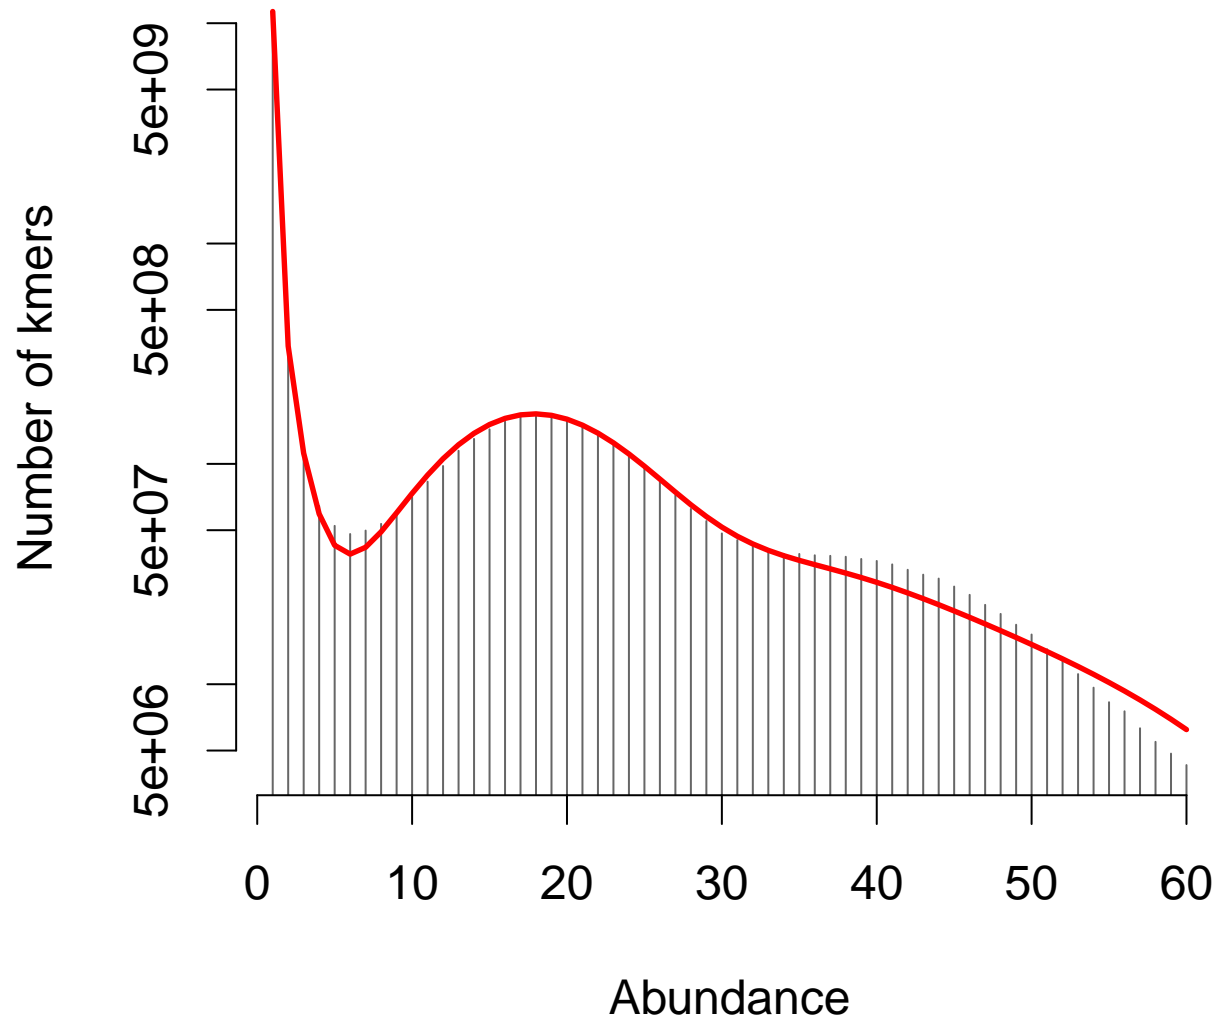

k= 71

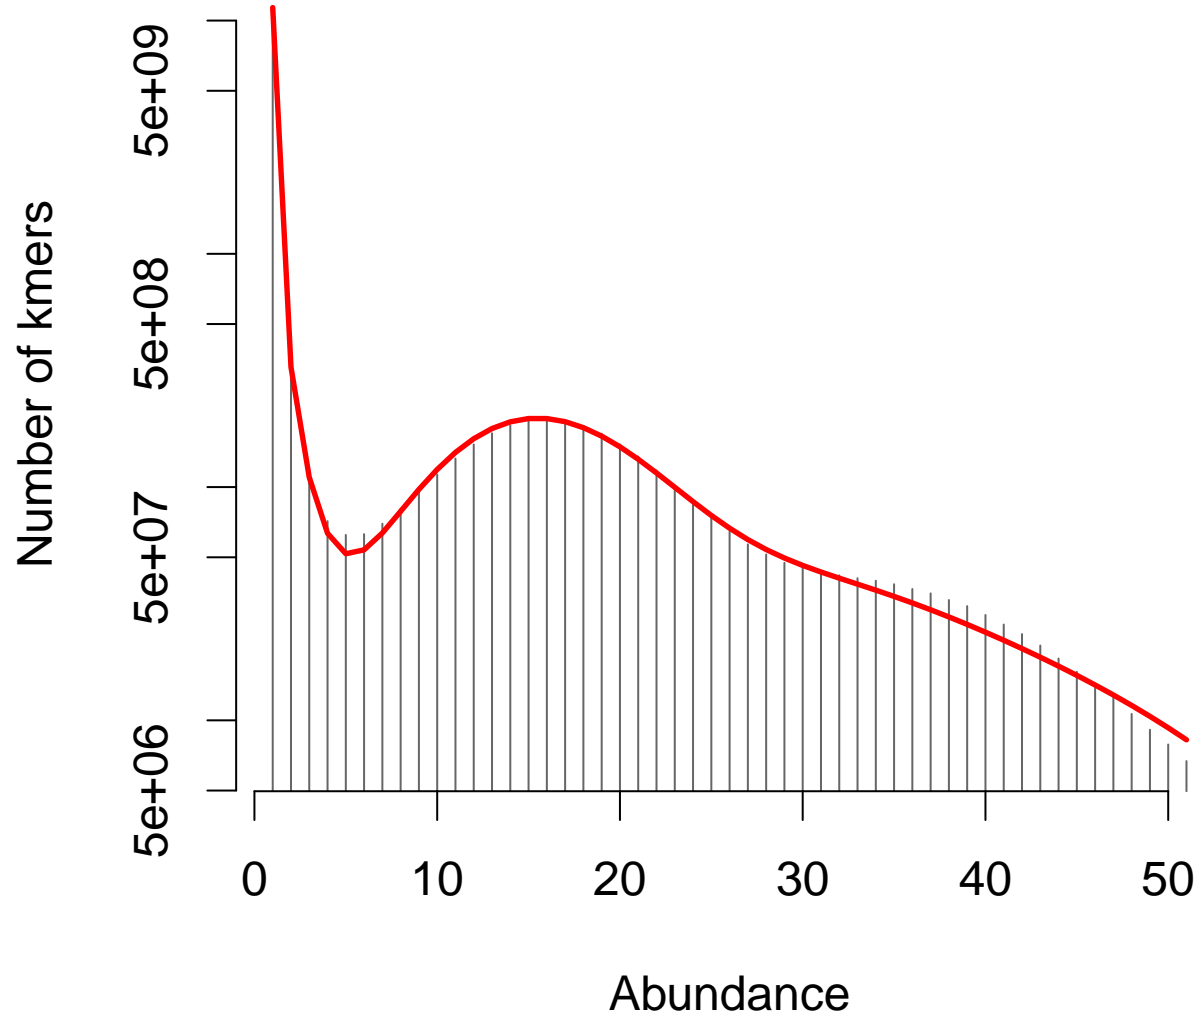

k= 81

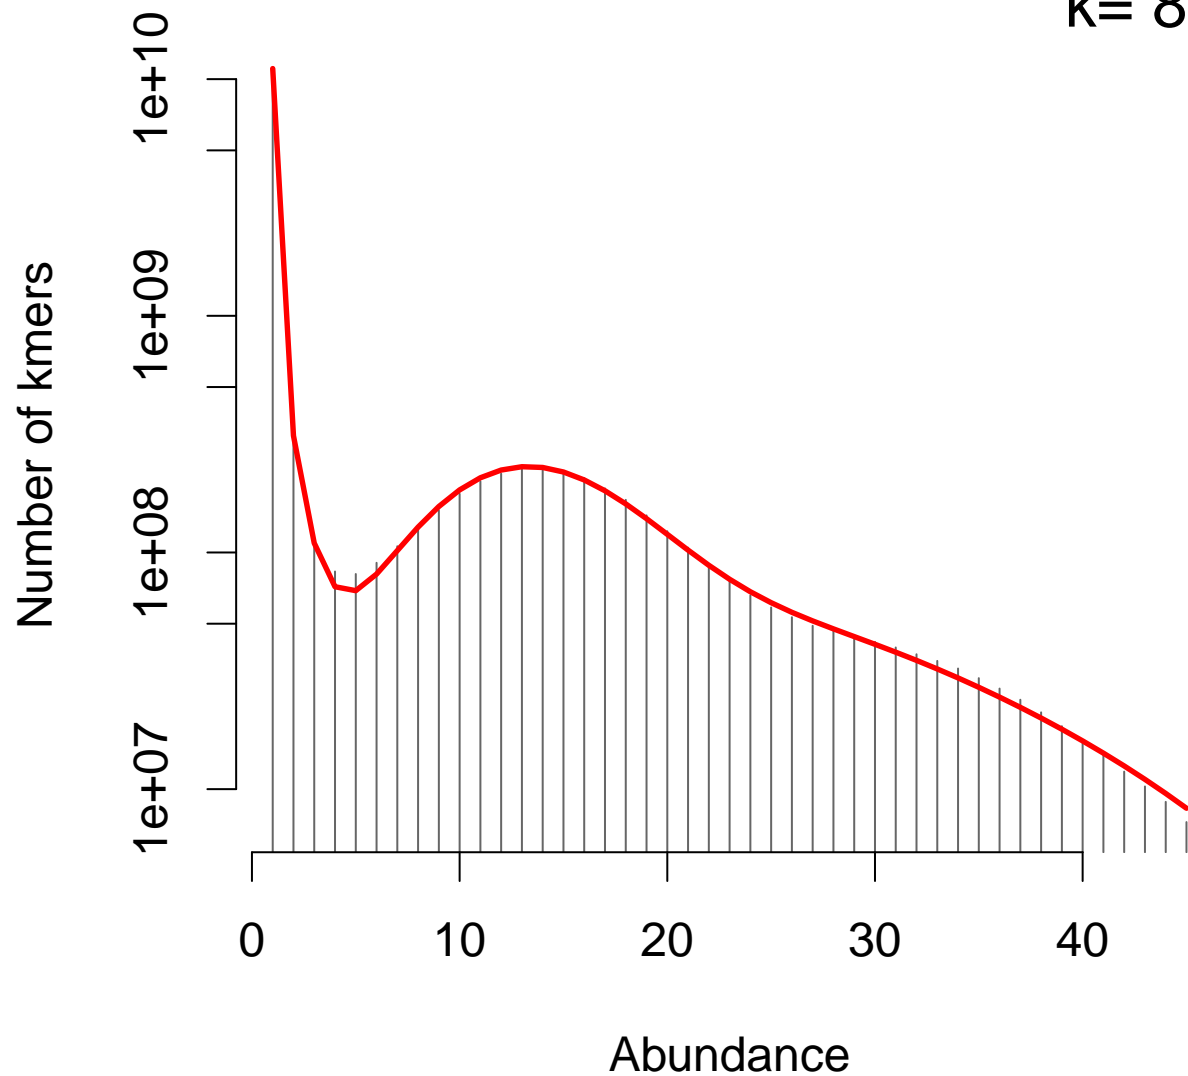

k= 91

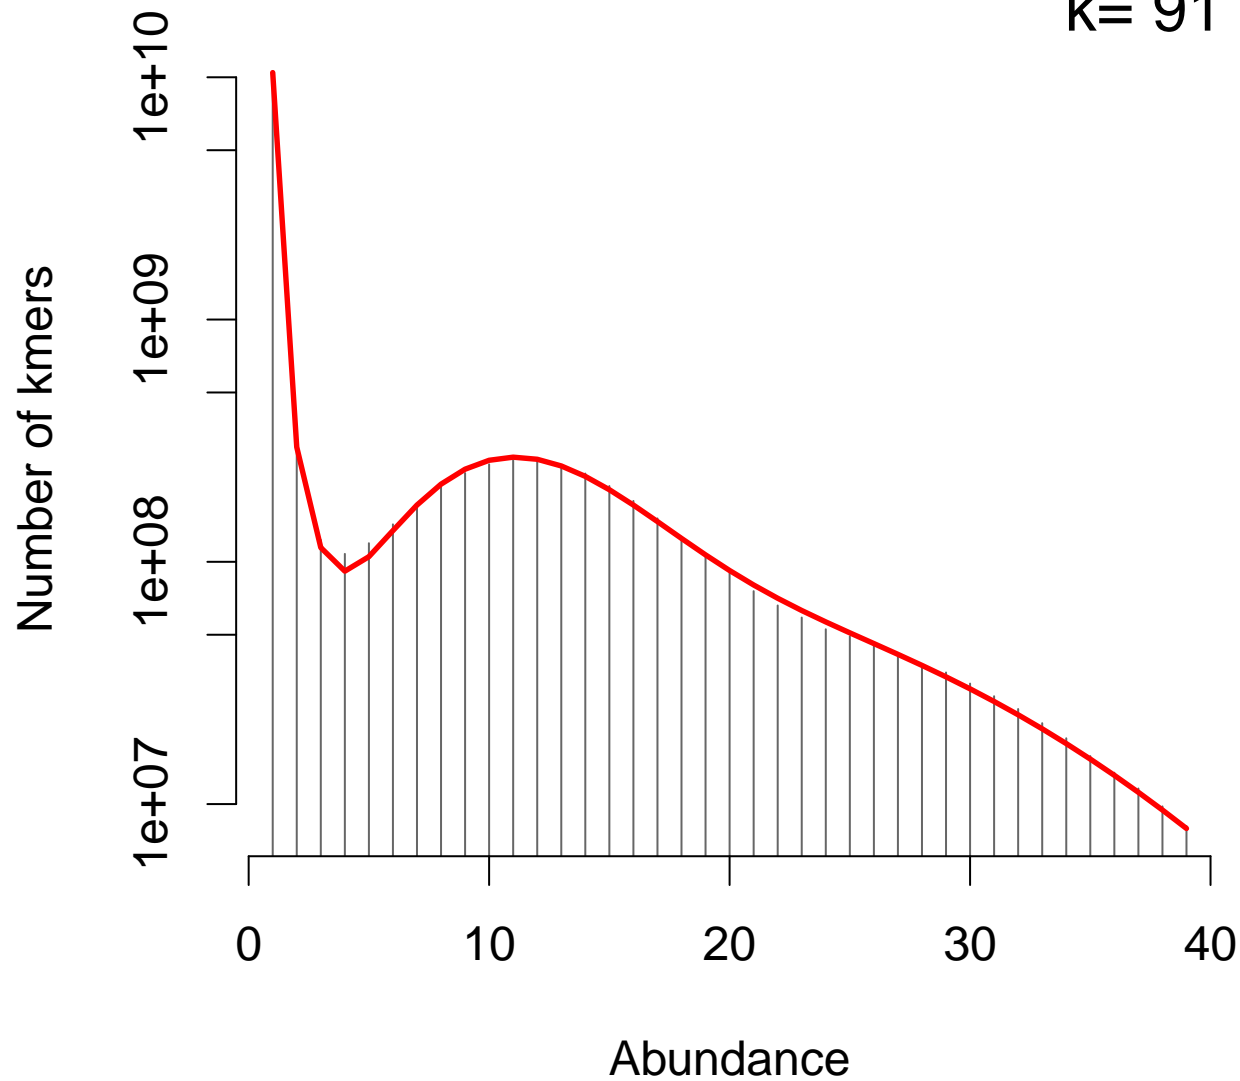



k= 97

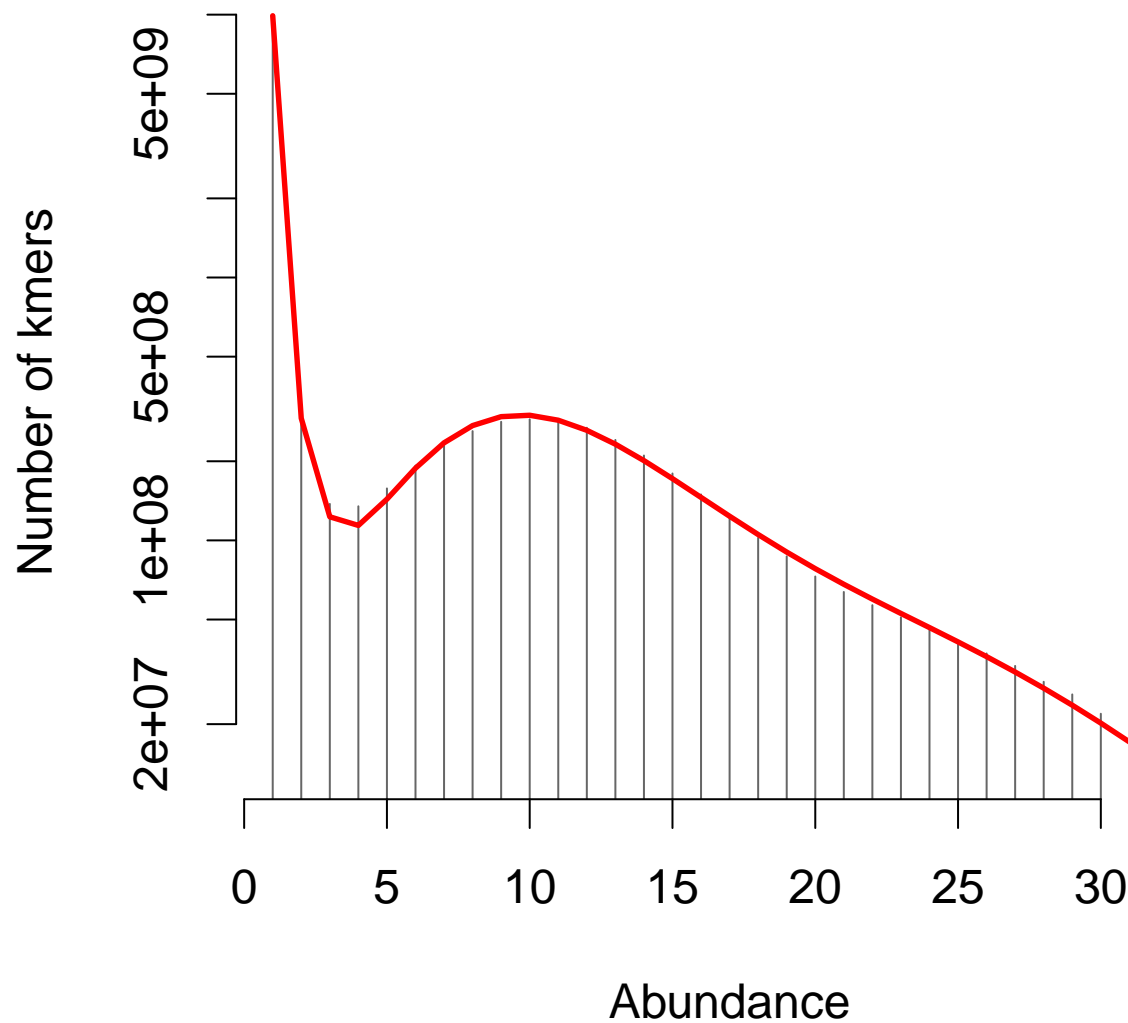

k= 99

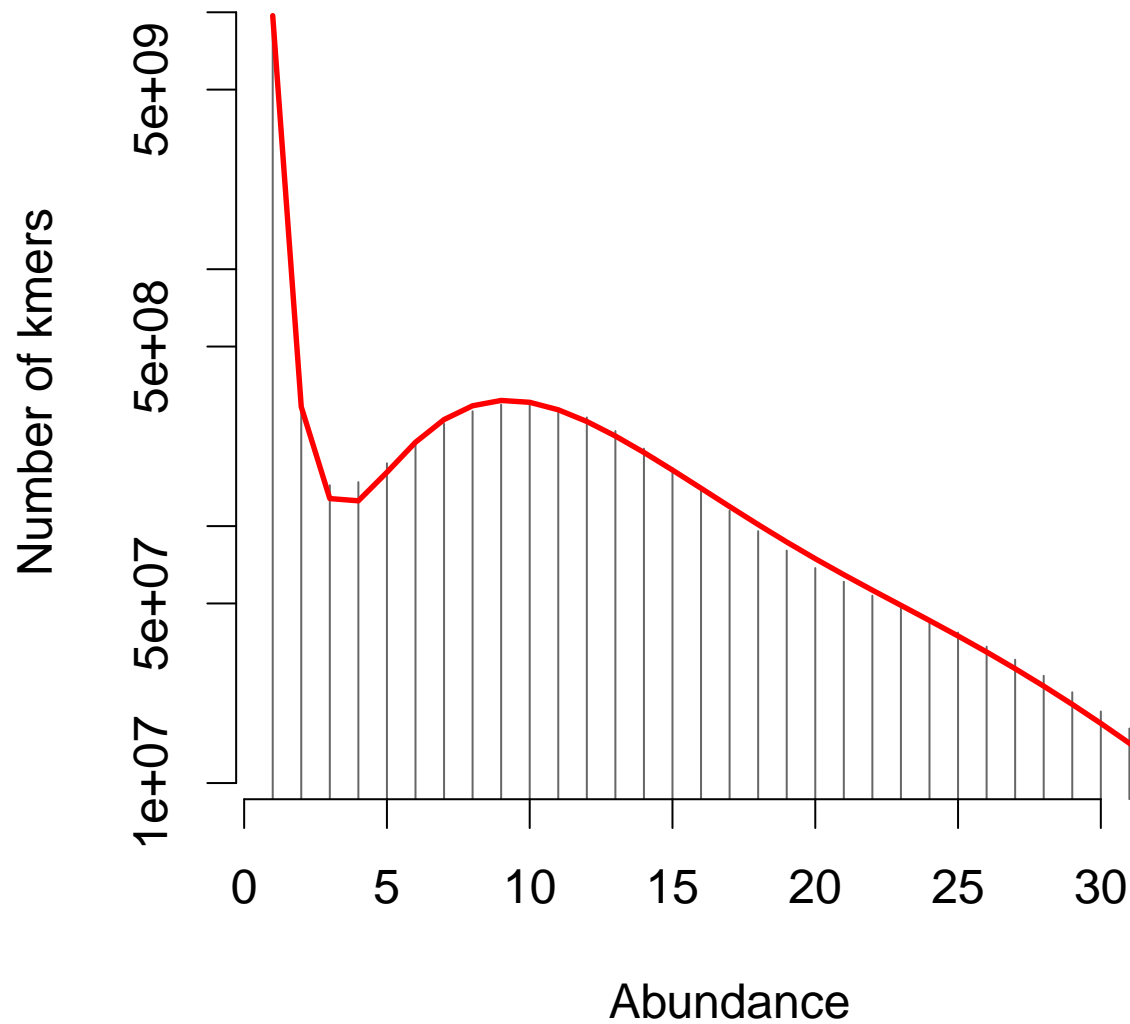

k= 101

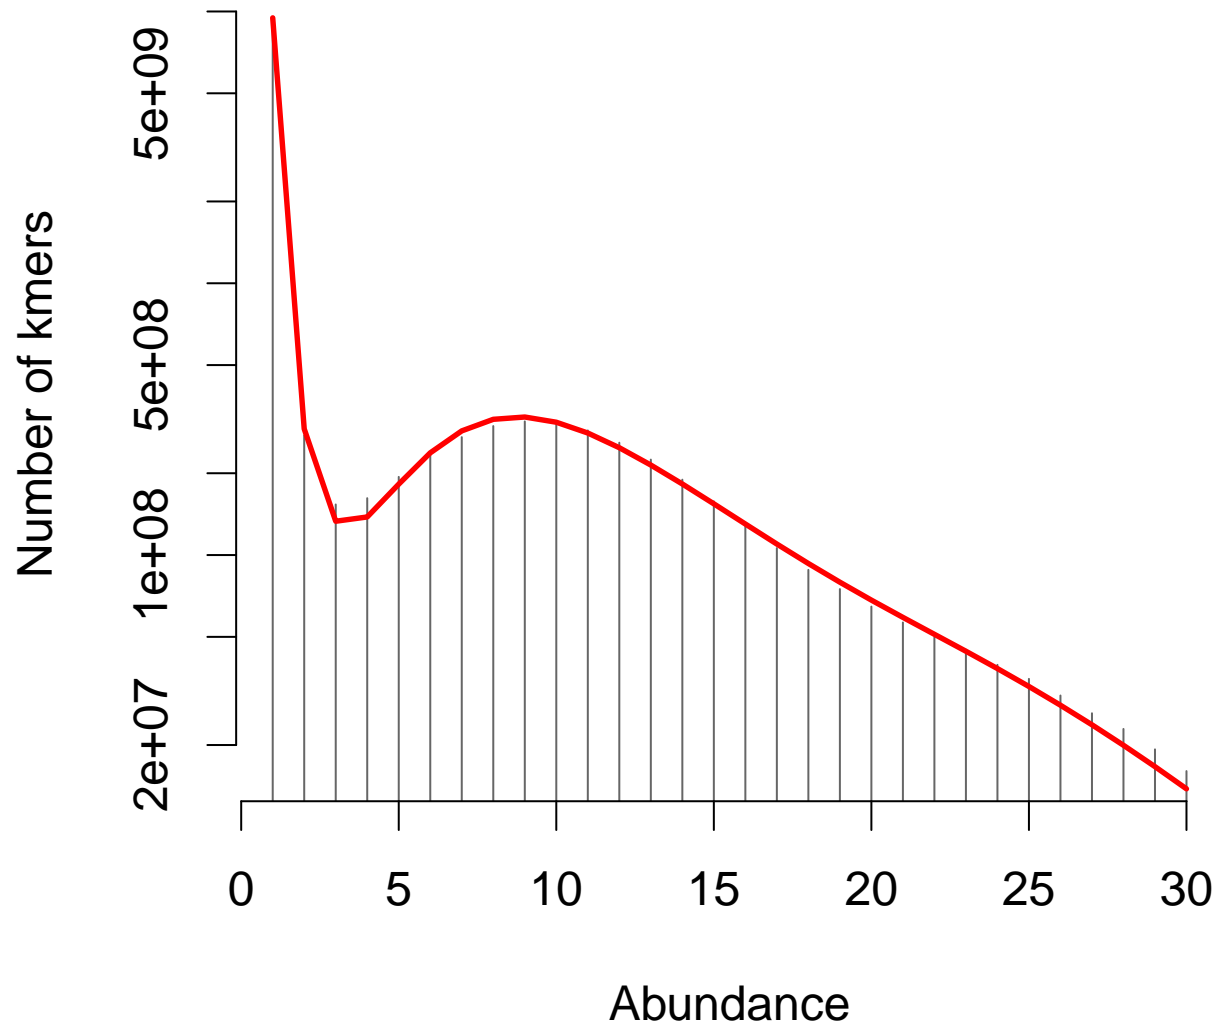

k= 103

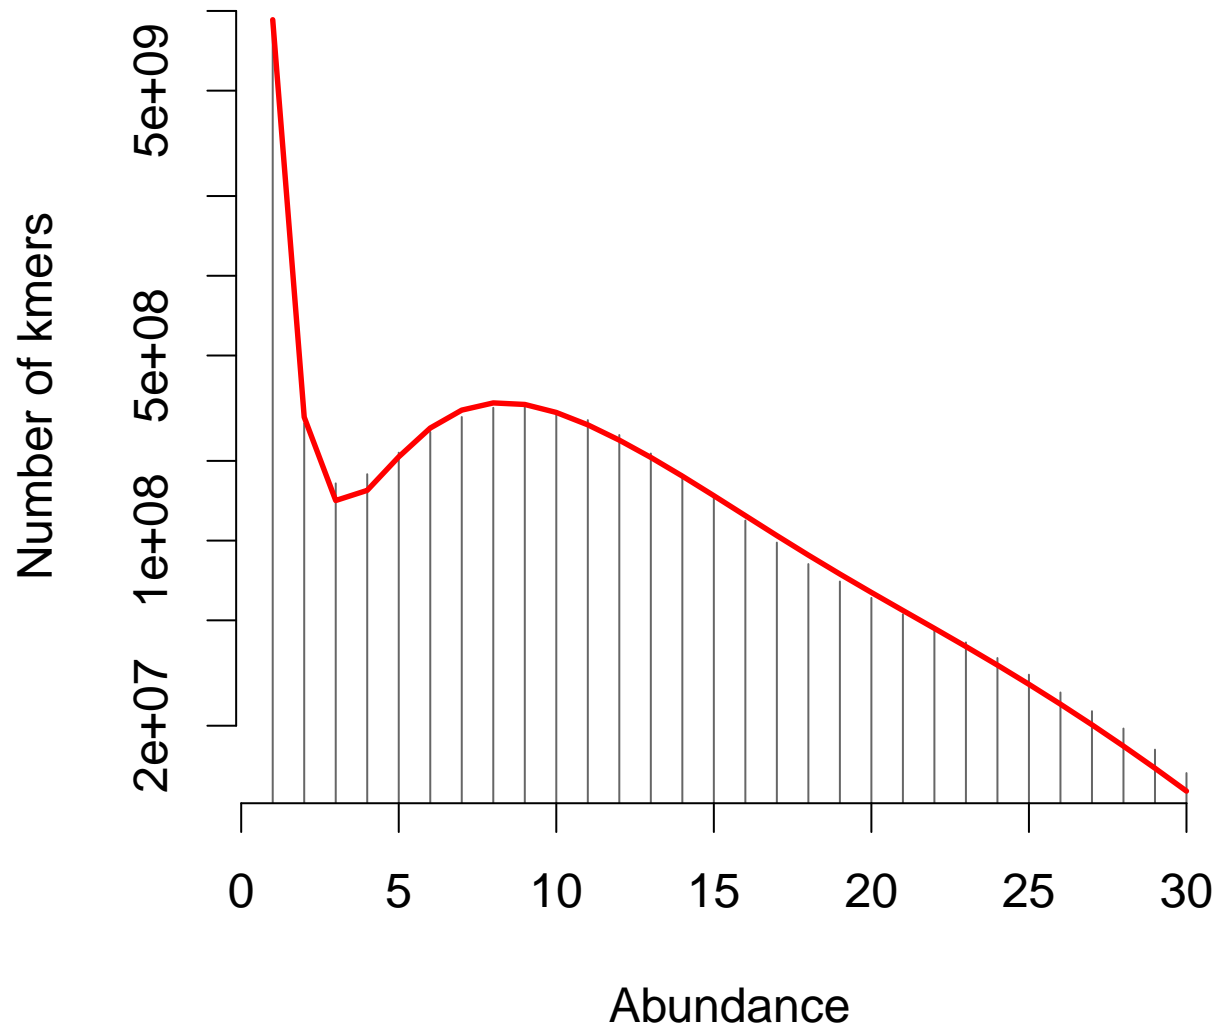

k= 105

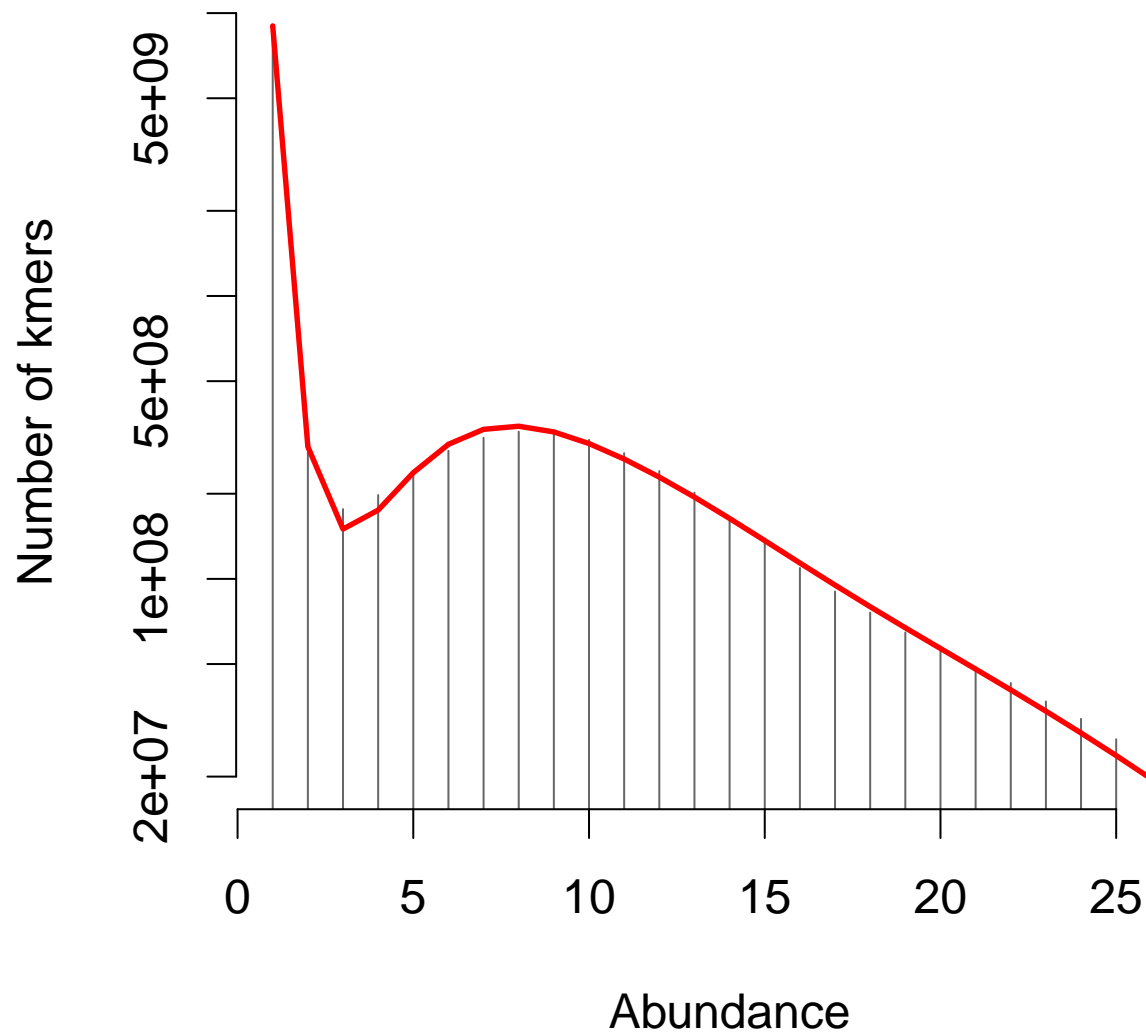

k= 107

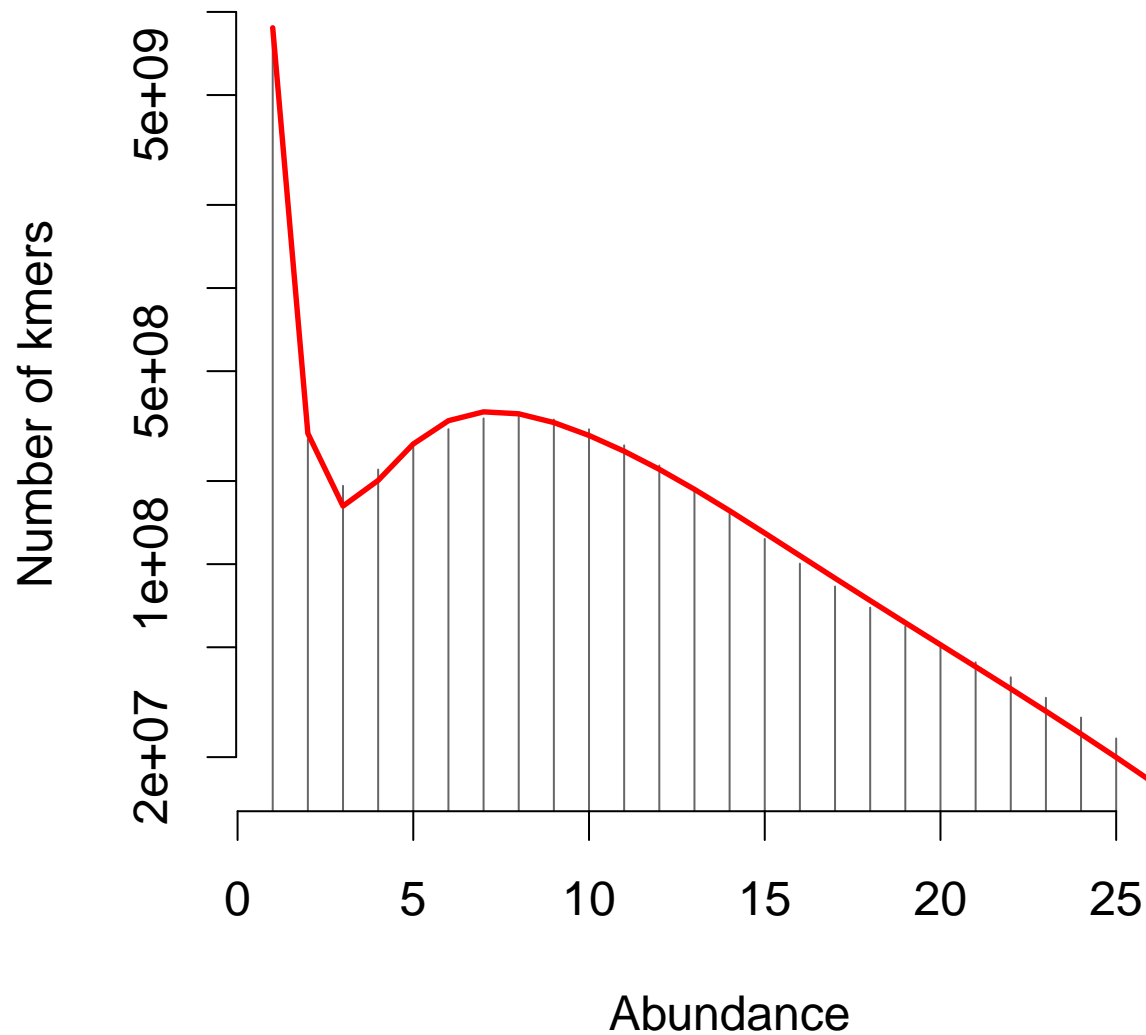

k= 111

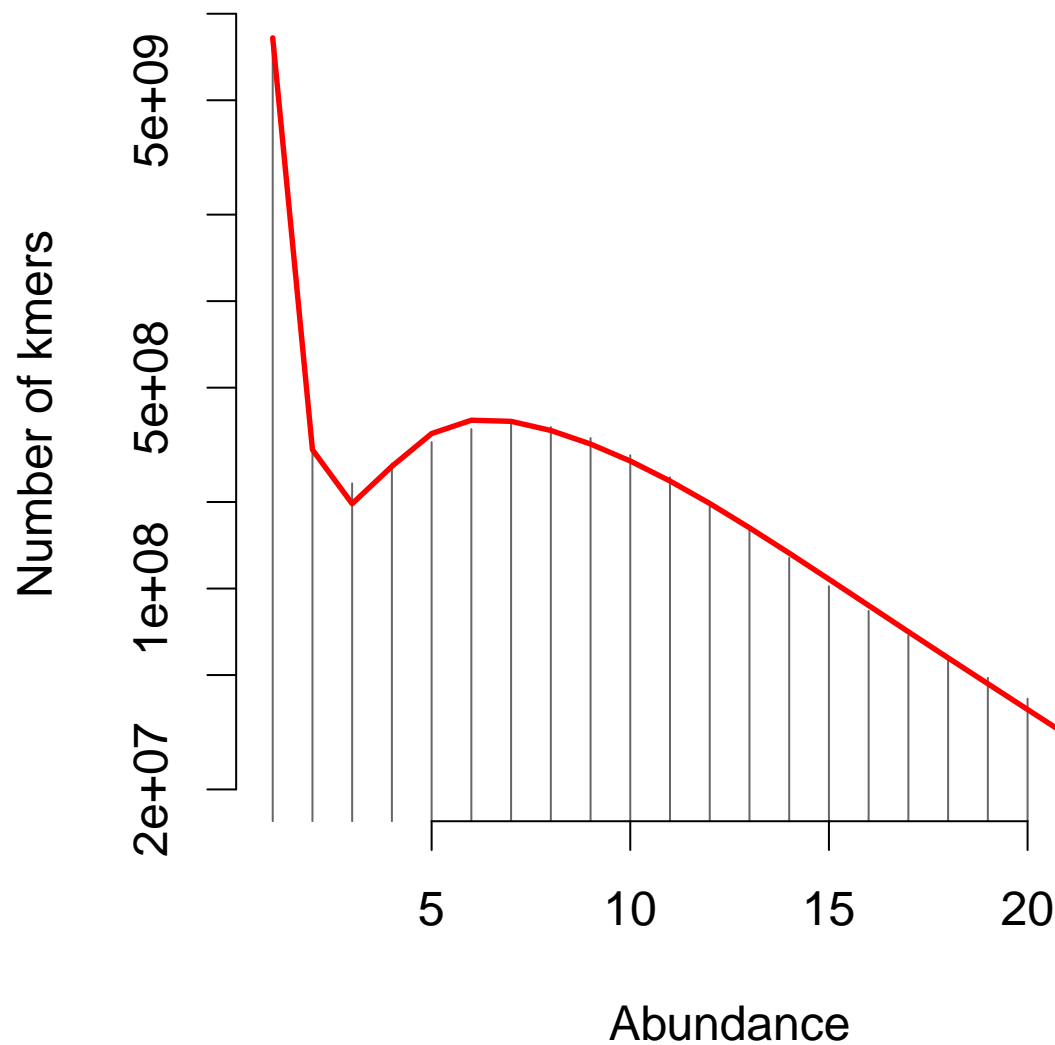

k= 121

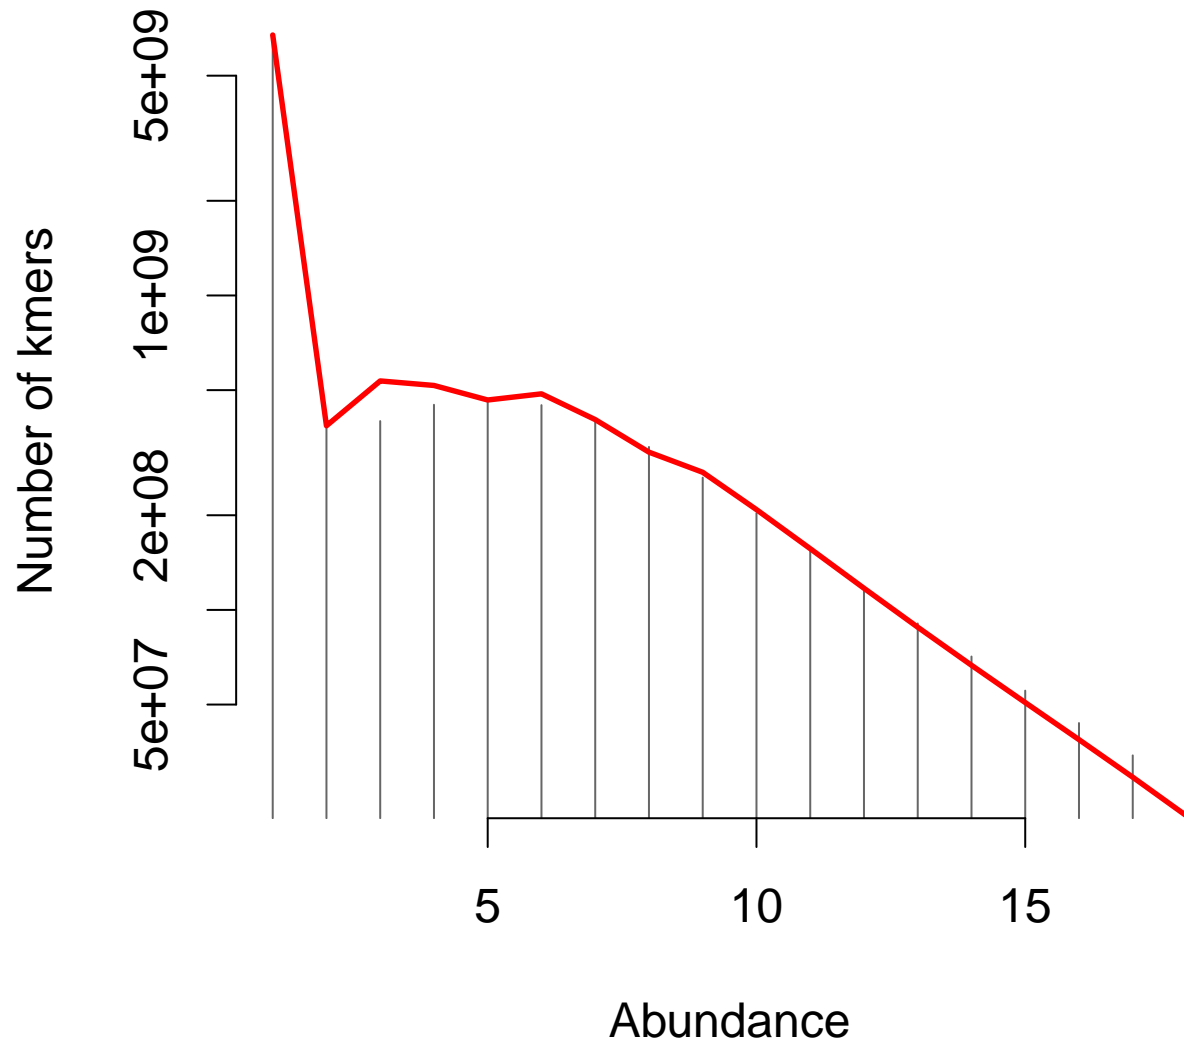

Supplement: s1 [file s1]

Number of genomic k-mers

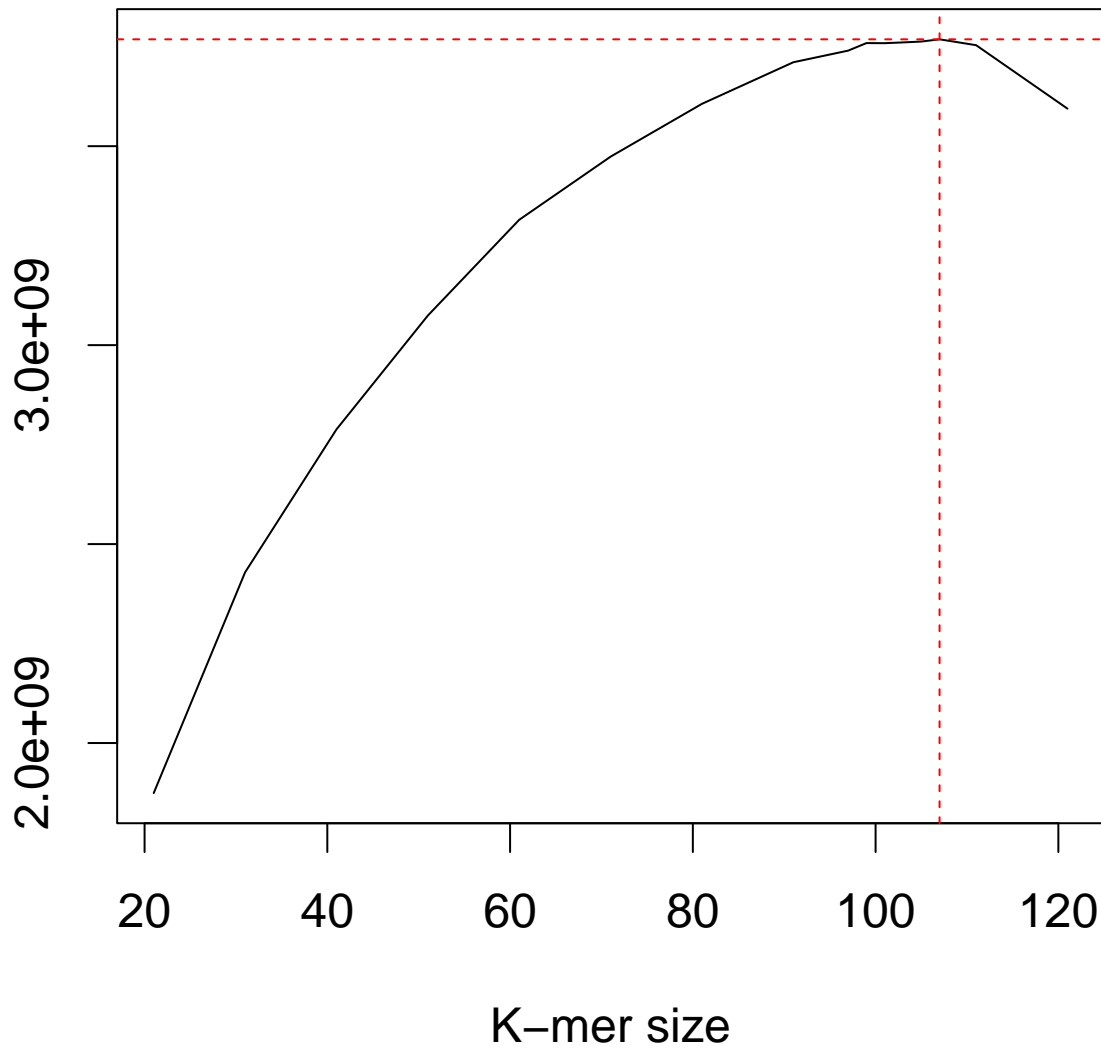

Supplement: s1 [file s1]
